# Supplementary material for: Intelligence, alcohol consumption, and adverse consequences. A study of young Norwegian men
Source: PubMed Central journal article supplement (PMC8135245; doi:10.1177/1403494820944719), 2020-09-11
Supplement: SJP944719_Supplemental_Material.pdf [file SJP944719_Supplemental_Material.pdf]

# Supplementary material

Intelligence, alcohol consumption and adverse consequences.

A study of young Norwegian men

## **S1: Question wordings for the adverse consequences scale**

The items used for the adverse consequence scale at T3 are selected questions from the Rutgers Alcohol Problem Index (RAPI) <sup>36</sup>.

At T3, respondents were asked

*“Remember the past 12 months. How often during this time have you experienced the following problems related to your use of alcohol? (If you haven’t been drinking, skip the questions)*

*[1] Gotten involved in a fight, behaved badly or hurt someone*

*[2a] Gone drunk to school or work*

*[3] Tried to control the drinking by limiting it to certain hours or certain places*

*[4] Suddenly appeared somewhere without remembering how you got there*

*[5] Been told by a friend or neighbor that you should stop or limit your drinking”.*

with response options “Never”, “1 time”, “2–4 times”, “5–10 times” and “11 times or more”.

Respondents who had not been drinking in the past 12 months were assigned to “Never”.

Response options were coded with values from 1 to 5. The additive scale was created by taking the mean response value for all five items, and setting the scale value to missing if one or more individual scale items was missing. Cronbach’s  $\alpha$  of the whole 5-item scale was 0.609.

## S2: Descriptive statistics for control variables

| Variable                                            | Mean    | SD   | N respondents<br>(non-missing) |
|-----------------------------------------------------|---------|------|--------------------------------|
| Parental bonding instrument, T1                     | 2.01    | 0.42 | 1042                           |
| Conduct problems scale, T1                          | 0.41    | 0.41 | 1034                           |
|                                                     | Percent |      |                                |
| <b>Parental education (register)</b>                |         |      |                                |
| University/college, long                            | 14.02   |      | 157                            |
| University/college, short                           | 30.89   |      | 346                            |
| High school/upper secondary (general or vocational) | 47.68   |      | 534                            |
| Junior high school/comprehensive school or less     | 7.23    |      | 81                             |
| Missing register information on both parents        | 0.18    |      | 2                              |
| <b>Father's employment status at T1</b>             |         |      |                                |
| Full-time                                           | 82.79   |      | 895                            |
| Part-time                                           | 4.63    |      | 50                             |
| Unemployed                                          | 1.76    |      | 19                             |
| Staying home                                        | 1.57    |      | 17                             |
| On welfare                                          | 1.76    |      | 19                             |
| Attending school, continuing education, or similar  | 1.20    |      | 13                             |
| Non-response                                        | 6.29    |      | 68                             |
| <b>Mother's employment status at T1</b>             |         |      |                                |
| Full-time                                           | 51.53   |      | 557                            |
| Part-time                                           | 28.58   |      | 309                            |
| Unemployed                                          | 1.67    |      | 18                             |
| Staying home                                        | 9.25    |      | 100                            |
| On welfare                                          | 2.50    |      | 27                             |
| Attending school, continuing education, or similar  | 3.42    |      | 37                             |
| Non-response                                        | 3.05    |      | 33                             |
| <b>Father's occupational class at T1</b>            |         |      |                                |
| Other/Unknown                                       | 5.92    |      | 64                             |
| Higher administrative occupation                    | 13.23   |      | 143                            |
| Various middle positions                            | 38.85   |      | 420                            |
| Lower functionary and more                          | 6.11    |      | 66                             |
| Primary industry                                    | 6.01    |      | 65                             |
| Worker                                              | 25.07   |      | 271                            |
| Not employed                                        | 4.81    |      | 52                             |
| <b>Mother's occupational class at T1</b>            |         |      |                                |
| Higher administrative occupation                    | 2.10    |      | 22                             |
| Various middle positions                            | 33.65   |      | 353                            |
| Lower functionary and more                          | 35.37   |      | 371                            |
| Primary industry                                    | 1.81    |      | 19                             |
| Worker                                              | 11.15   |      | 117                            |
| Not employed                                        | 15.92   |      | 167                            |
| <b>Lived with both parents at T1</b>                |         |      |                                |
| Yes                                                 | 78.50   |      | 836                            |
| No                                                  | 21.50   |      | 229                            |
| <b>How often seen parents drunk at T1</b>           |         |      |                                |
| Never                                               | 55.46   |      | 579                            |
| A few times                                         | 29.31   |      | 306                            |
| A few times a year                                  | 10.15   |      | 106                            |
| A few times a month                                 | 3.54    |      | 37                             |
| A few times a week                                  | 1.53    |      | 16                             |
| <b>Best friend drinks weekly at T1</b>              |         |      |                                |
| Yes                                                 | 12.17   |      | 137                            |
| No                                                  | 87.83   |      | 989                            |

### S3: Distribution of the main variables

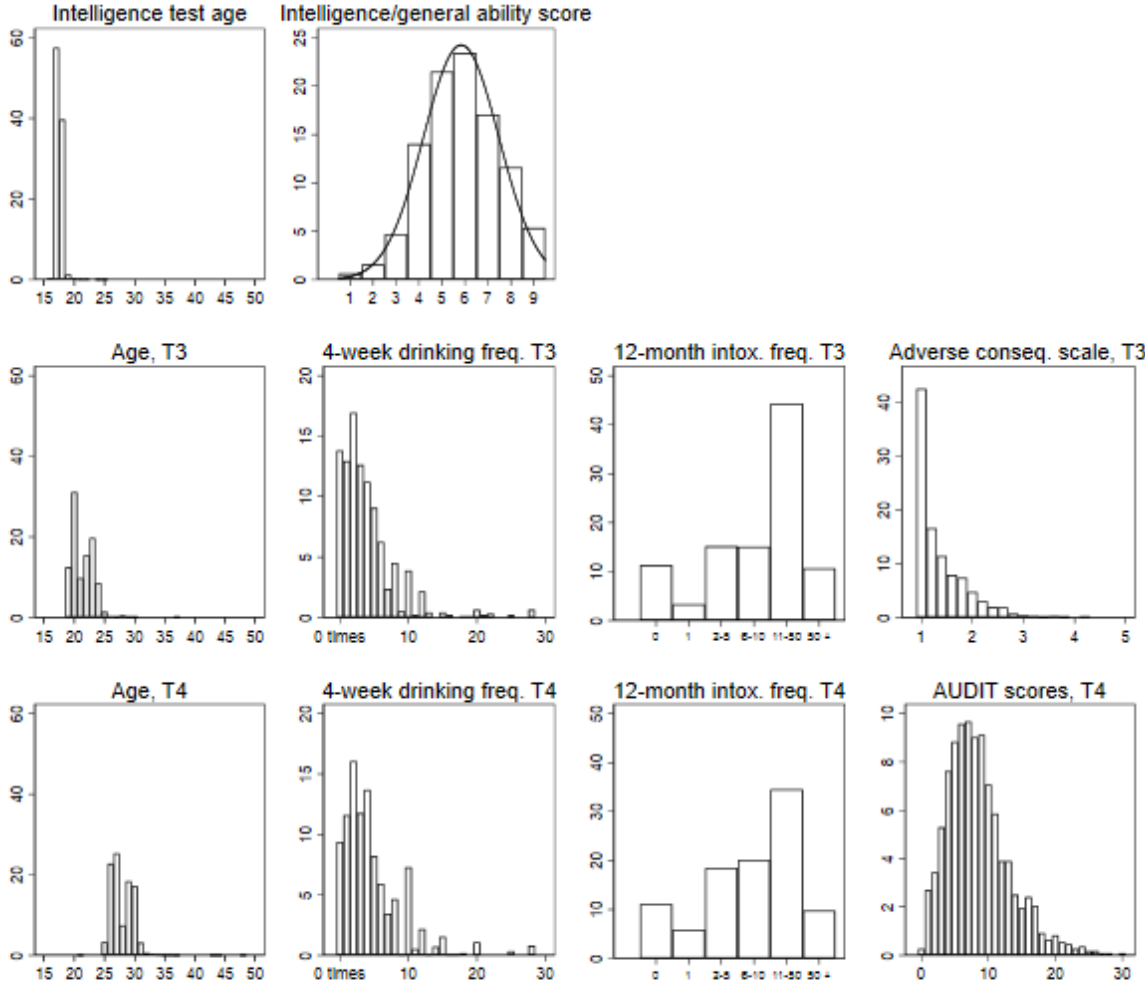

Note: All y-axes show percentages

## S4: Supplementary analysis

OLS regression results for the associations between intelligence test scores interacted with 4-week drinking frequency, and standardized adverse consequences scale (T3) and AUDIT (T4).

|                                                                     | Model 1<br>Coefficient<br>(robust SE) | Model 2<br>Coefficient<br>(robust SE) | Model 3<br>Coefficient<br>(robust SE) | Model 4<br>Coefficient<br>(robust SE) |
|---------------------------------------------------------------------|---------------------------------------|---------------------------------------|---------------------------------------|---------------------------------------|
| <i>Panel 1</i>                                                      |                                       |                                       |                                       |                                       |
| <i>Dependent variable: Adverse consequences scale, standardized</i> |                                       |                                       |                                       |                                       |
| Intelligence score (stanines)                                       | -0.020<br>(0.030)                     | -0.009<br>(0.031)                     | -0.004<br>(0.031)                     | -0.006<br>(0.031)                     |
| Drinking frequency (T3)                                             | 0.131*<br>(0.058)                     | 0.133*<br>(0.057)                     | 0.131*<br>(0.055)                     | 0.127*<br>(0.053)                     |
| Intelligence score (stanines) x Drinking frequency (T3)             | -0.008<br>(0.009)                     | -0.009<br>(0.008)                     | -0.009<br>(0.008)                     | -0.009<br>(0.008)                     |
| Observations                                                        | 750                                   | 750                                   | 750                                   | 750                                   |
| R <sup>2</sup>                                                      | 0.143                                 | 0.189                                 | 0.205                                 | 0.231                                 |
| Adjusted R <sup>2</sup>                                             | 0.139                                 | 0.154                                 | 0.165                                 | 0.190                                 |
| <i>Panel 2</i>                                                      |                                       |                                       |                                       |                                       |
| <i>Dependent variable: AUDIT (without consumption items)</i>        |                                       |                                       |                                       |                                       |
| Intelligence score (stanines)                                       | 0.022<br>(0.084)                      | 0.027<br>(0.090)                      | 0.071<br>(0.090)                      | 0.073<br>(0.090)                      |
| Drinking frequency (T4)                                             | 0.360**<br>(0.116)                    | 0.357**<br>(0.117)                    | 0.386***<br>(0.113)                   | 0.393***<br>(0.112)                   |
| Intelligence score (stanines) x Drinking frequency (T4)             | -0.015<br>(0.019)                     | -0.015<br>(0.019)                     | -0.020<br>(0.019)                     | -0.021<br>(0.019)                     |
| Observations                                                        | 877                                   | 877                                   | 877                                   | 877                                   |
| R <sup>2</sup>                                                      | 0.165                                 | 0.192                                 | 0.220                                 | 0.235                                 |
| Adjusted R <sup>2</sup>                                             | 0.161                                 | 0.161                                 | 0.185                                 | 0.199                                 |
| <i>Controls:</i>                                                    |                                       |                                       |                                       |                                       |
| Age                                                                 | yes                                   | yes                                   | yes                                   | yes                                   |
| Parents' educational level (register)                               |                                       | yes                                   | yes                                   | yes                                   |
| Parents' employment status at T1                                    |                                       | yes                                   | yes                                   | yes                                   |
| Parents' occupational class at T1                                   |                                       | yes                                   | yes                                   | yes                                   |
| Lived with both parents at T1                                       |                                       | yes                                   | yes                                   | yes                                   |
| Parental Bonding Instrument (PBI)                                   |                                       |                                       | yes                                   | yes                                   |
| How often seen parents drunk                                        |                                       |                                       | yes                                   | yes                                   |
| Conduct problems scale                                              |                                       |                                       |                                       | yes                                   |
| Best friend drinks weekly                                           |                                       |                                       |                                       | yes                                   |

Note: T1 is survey wave 1, when respondents were around 15 years old. T3 is survey wave 3, when respondents were around 22 years old. T4 is survey wave 4, when respondents were around 28 years old.

\*p < 0.05; \*\*p < 0.01; \*\*\*p < 0.001
